# Supplementary material for: Developmental Trajectories of Student Self-Perception over a Yearlong Introductory Biology Sequence
Source: Atypon-hosted journal article supplement (doi:10.1187/cbe.21-12-0326), 2022-08-23
Supplement: combinedsupmats.pdf [file combinedsupmats.pdf]

# Supplemental Material

*CBE—Life Sciences Education*

Cole and Beck

Table S1: Demographics of the sample

| Female/male | First-generation | PEER      | Race/ethnicity   | Count |
|-------------|------------------|-----------|------------------|-------|
| Female      | Yes              | Yes       | African American | 13    |
|             |                  |           | Hispanic         | 9     |
|             |                  |           | Multi-racial     | 6     |
|             |                  | No        | Asian            | 14    |
|             |                  |           | Caucasian        | 7     |
|             |                  |           | Missing          | 1     |
|             | No               | Yes       | African American | 8     |
|             |                  |           | Hispanic         | 9     |
|             |                  |           | Multi-racial     | 11    |
|             |                  | No        | Asian            | 68    |
|             |                  |           | Caucasian        | 63    |
|             |                  |           | Multi-racial     | 4     |
|             | Missing          | Missing   | 1                |       |
|             | Missing          | Yes       | African American | 1     |
|             |                  |           | Hispanic         | 1     |
| No          |                  | Asian     | 4                |       |
|             |                  | Caucasian | 3                |       |
| Male        | Yes              | Yes       | African American | 1     |
|             |                  |           | Hispanic         | 6     |
|             |                  |           | Multi-racial     | 1     |
|             |                  | No        | Asian            | 11    |
|             |                  |           | Caucasian        | 3     |
|             | No               | Yes       | African American | 3     |

|         |         |         |                  |    |
|---------|---------|---------|------------------|----|
|         |         |         | Hispanic         | 3  |
|         |         |         | Multi-racial     | 9  |
|         |         | No      | Asian            | 42 |
|         |         |         | Caucasian        | 26 |
|         |         |         | Multi-racial     | 3  |
|         | Missing | Missing | 2                |    |
|         | Missing | Yes     | Hispanic         | 1  |
|         |         | No      | Asian            | 6  |
|         |         |         | Caucasian        | 1  |
|         |         | Missing | Missing          | 1  |
| Missing | Yes     | Missing | Missing          | 1  |
|         | No      | Yes     | African American | 1  |
|         |         | No      | Caucasian        | 2  |
|         |         | Missing | Missing          | 2  |
|         | Missing | No      | Multi-racial     | 1  |
|         |         | Missing | Missing          | 1  |

Table S2: Comparison of student affect measures for students who completed all three surveys compared to those that did not complete survey at the end of the second semester of introductory biology

|                                                | Self-efficacy |                    |             | Science identity |                    |             | Scientific community values |                    |             |
|------------------------------------------------|---------------|--------------------|-------------|------------------|--------------------|-------------|-----------------------------|--------------------|-------------|
|                                                | Mean          | Standard Deviation | Effect Size | Mean             | Standard Deviation | Effect Size | Mean                        | Standard Deviation | Effect Size |
| <b>Beginning of first semester</b>             |               |                    |             |                  |                    |             |                             |                    |             |
| Completed end of second-semester survey        | 3.76          | 0.67               | 0.25        | 3.66             | 0.71               | 0.58        | 5.22                        | 0.69               | 0.47        |
| Did not complete end of second-semester survey | 3.59          | 0.71               |             | 3.21             | 0.83               |             | 4.83                        | 0.95               |             |
| <b>End of first semester</b>                   |               |                    |             |                  |                    |             |                             |                    |             |
| Completed end of second-semester survey        | 4.31          | 0.69               | 0.38        | 3.96             | 0.78               | 0.58        | 5.29                        | 0.73               | 0.53        |
| Did not complete end of second-semester survey | 4.03          | 0.79               |             | 3.45             | 0.96               |             | 4.83                        | 1.00               |             |

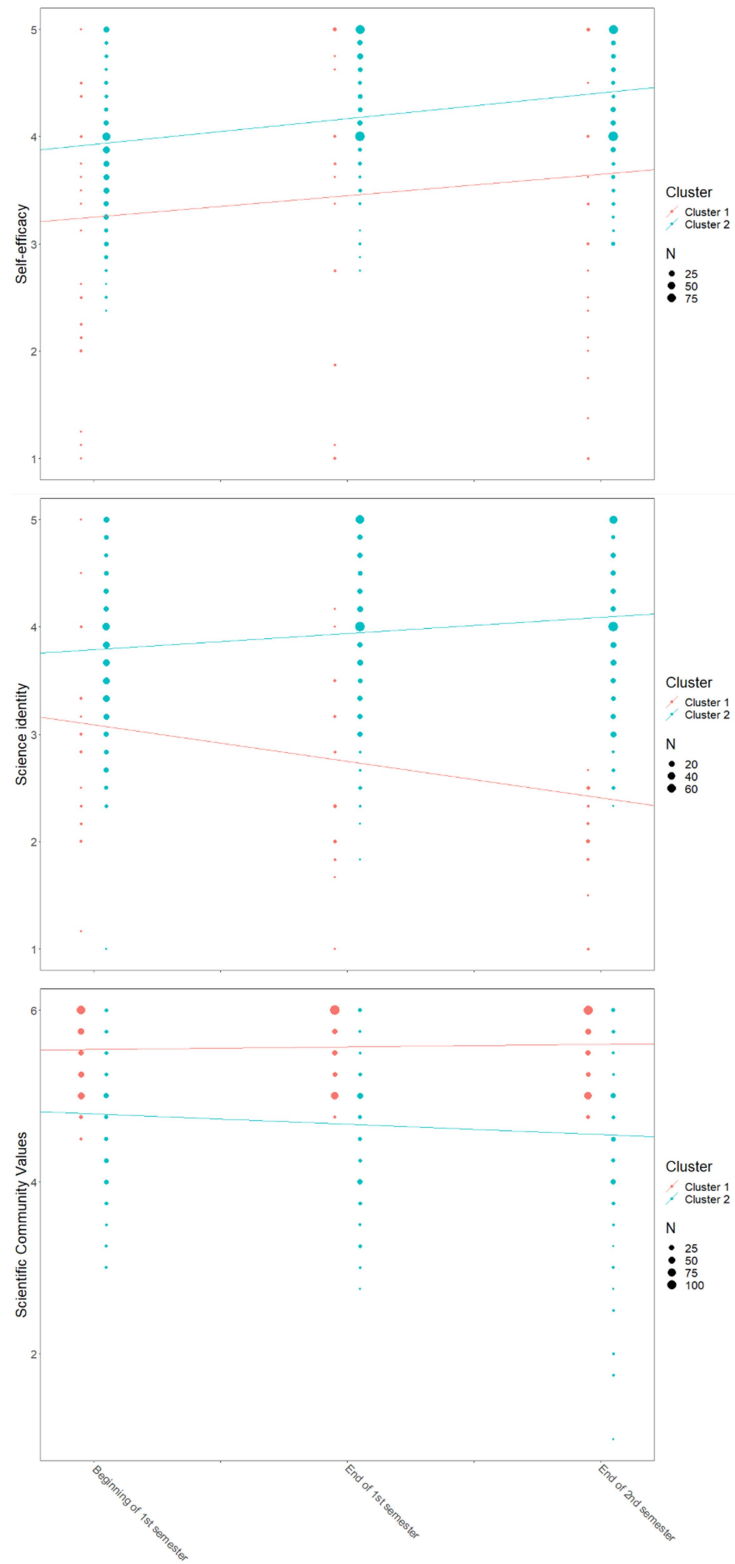

Figure S1. Developmental trajectories for self-efficacy, science identity, and scientific community values based on growth mixture models

Table S3: Student self-efficacy at the beginning, middle, and end of a two-semester introductory biology sequence for different demographic groups.

| Cluster 1            |     |                      |        |                |        |                |        |
|----------------------|-----|----------------------|--------|----------------|--------|----------------|--------|
|                      |     | Beginning Semester 1 |        | End Semester 1 |        | End Semester 2 |        |
|                      | N   | Mean                 | St Dev | Mean           | St Dev | Mean           | St Dev |
| Female               | 19  | 2.63                 | 1.07   | 3.89           | 1.40   | 3.49           | 1.26   |
| Male                 | 5   | 3.98                 | 0.96   | 2.17           | 1.63   | 3.50           | 1.26   |
| Missing              | 2   | 3.00                 | 1.41   | 2.75           | 0.00   | 1.50           | 0.71   |
|                      |     |                      |        |                |        |                |        |
| not PEERS            | 18  | 3.03                 | 1.21   | 3.73           | 1.48   | 3.47           | 1.40   |
| PEERS                | 6   | 2.56                 | 1.03   | 2.94           | 1.89   | 3.56           | 0.50   |
| Missing              | 2   | 3.00                 | 1.41   | 2.75           | 0.00   | 1.50           | 0.71   |
|                      |     |                      |        |                |        |                |        |
| not first-generation | 18  | 2.77                 | 1.14   | 3.51           | 1.54   | 3.39           | 1.41   |
| first-generation     | 5   | 3.48                 | 1.36   | 3.12           | 1.94   | 3.35           | 1.34   |
| Missing              | 3   | 2.88                 | 0.99   | 3.79           | 1.13   | 3.00           | 0.88   |
|                      |     |                      |        |                |        |                |        |
| Cluster 2            |     |                      |        |                |        |                |        |
|                      |     | Beginning Semester 1 |        | End Semester 1 |        | End Semester 2 |        |
|                      | N   | Mean                 | St Dev | Mean           | St Dev | Mean           | St Dev |
| Female               | 204 | 3.76                 | 0.55   | 4.37           | 0.51   | 4.27           | 0.53   |
| Male                 | 113 | 3.94                 | 0.59   | 4.42           | 0.49   | 4.37           | 0.55   |
| Missing              | 5   | 3.75                 | 0.32   | 3.82           | 0.65   | 4.15           | 0.42   |
|                      |     |                      |        |                |        |                |        |
| not PEERS            | 239 | 3.87                 | 0.58   | 4.42           | 0.52   | 4.35           | 0.55   |
| PEERS                | 77  | 3.69                 | 0.50   | 4.26           | 0.46   | 4.20           | 0.50   |
| Missing              | 6   | 3.81                 | 0.63   | 4.35           | 0.46   | 4.19           | 0.42   |
|                      |     |                      |        |                |        |                |        |
| not first-generation | 239 | 3.85                 | 0.57   | 4.39           | 0.51   | 4.34           | 0.55   |
| first-generation     | 66  | 3.73                 | 0.55   | 4.39           | 0.49   | 4.24           | 0.51   |

|         |    |      |      |      |      |      |      |
|---------|----|------|------|------|------|------|------|
| Missing | 17 | 3.83 | 0.54 | 4.21 | 0.62 | 4.09 | 0.49 |
|---------|----|------|------|------|------|------|------|

Table S4: Student science identity at the beginning, middle, and end of a two-semester introductory biology sequence for different demographic groups.

| Cluster 1            |     |                      |        |                |        |                |        |
|----------------------|-----|----------------------|--------|----------------|--------|----------------|--------|
|                      |     | Beginning Semester 1 |        | End Semester 1 |        | End Semester 2 |        |
|                      | N   | Mean                 | St Dev | Mean           | St Dev | Mean           | St Dev |
| Female               | 14  | 2.69                 | 0.47   | 2.54           | 0.62   | 2.02           | 0.43   |
| Male                 | 6   | 3.31                 | 1.47   | 2.94           | 1.26   | 2.25           | 0.23   |
| Missing              | 3   | 3.11                 | 1.02   | 2.11           | 0.19   | 1.67           | 0.58   |
|                      |     |                      |        |                |        |                |        |
| not PEERS            | 16  | 2.93                 | 0.96   | 2.75           | 0.86   | 2.12           | 0.43   |
| PEERS                | 4   | 2.67                 | 0.61   | 2.29           | 0.82   | 1.96           | 0.16   |
| Missing              | 3   | 3.11                 | 1.02   | 2.11           | 0.19   | 1.67           | 0.58   |
|                      |     |                      |        |                |        |                |        |
| not first-generation | 17  | 2.94                 | 0.99   | 2.62           | 0.88   | 2.01           | 0.47   |
| first-generation     | 4   | 2.83                 | 0.58   | 2.67           | 0.78   | 2.00           | 0.14   |
| Missing              | 2   | 2.75                 | 0.83   | 2.17           | 0.24   | 2.33           | 0.47   |
|                      |     |                      |        |                |        |                |        |
| Cluster 2            |     |                      |        |                |        |                |        |
|                      |     | Beginning Semester 1 |        | End Semester 1 |        | End Semester 2 |        |
|                      | N   | Mean                 | St Dev | Mean           | St Dev | Mean           | St Dev |
| Female               | 209 | 3.66                 | 0.70   | 4.03           | 0.67   | 3.97           | 0.65   |
| Male                 | 113 | 3.85                 | 0.59   | 4.14           | 0.67   | 4.10           | 0.68   |
| Missing              | 5   | 3.33                 | 0.46   | 3.20           | 0.18   | 3.47           | 0.36   |
|                      |     |                      |        |                |        |                |        |
| not PEERS            | 242 | 3.74                 | 0.69   | 4.10           | 0.69   | 4.07           | 0.68   |
| PEERS                | 79  | 3.65                 | 0.60   | 3.92           | 0.62   | 3.84           | 0.58   |
| Missing              | 6   | 3.78                 | 0.80   | 3.97           | 0.53   | 4.00           | 0.56   |
|                      |     |                      |        |                |        |                |        |
| not first-generation | 240 | 3.73                 | 0.70   | 4.06           | 0.69   | 4.03           | 0.68   |
| first-generation     | 69  | 3.67                 | 0.61   | 4.05           | 0.62   | 3.93           | 0.63   |



|         |    |      |      |      |      |      |      |
|---------|----|------|------|------|------|------|------|
| Missing | 18 | 3.79 | 0.46 | 4.07 | 0.74 | 4.10 | 0.49 |
|---------|----|------|------|------|------|------|------|

Table S5: Student science community values at the beginning, middle, and end of a two-semester introductory biology sequence for different demographic groups. The data are presented for two separate clusters that show different science community values across time based on a growth mixture model.

| Cluster 1            |     |                      |        |                |        |                |        |
|----------------------|-----|----------------------|--------|----------------|--------|----------------|--------|
|                      |     | Beginning Semester 1 |        | End Semester 1 |        | End Semester 2 |        |
|                      | N   | Mean                 | St Dev | Mean           | St Dev | Mean           | St Dev |
| Female               | 154 | 5.51                 | 0.45   | 5.61           | 0.44   | 5.55           | 0.45   |
| Male                 | 75  | 5.54                 | 0.44   | 5.66           | 0.41   | 5.59           | 0.43   |
| Missing              | 1   | 5.50                 | NA     | 4.75           | NA     | 5.75           | NA     |
|                      |     |                      |        |                |        |                |        |
| not PEERS            | 171 | 5.53                 | 0.44   | 5.65           | 0.42   | 5.59           | 0.45   |
| PEERS                | 55  | 5.48                 | 0.47   | 5.55           | 0.46   | 5.47           | 0.42   |
| Missing              | 4   | 5.62                 | 0.48   | 5.50           | 0.58   | 5.81           | 0.24   |
|                      |     |                      |        |                |        |                |        |
| not first-generation | 180 | 5.54                 | 0.44   | 5.61           | 0.44   | 5.58           | 0.44   |
| first-generation     | 42  | 5.43                 | 0.45   | 5.68           | 0.40   | 5.51           | 0.45   |
| Missing              | 8   | 5.41                 | 0.48   | 5.56           | 0.44   | 5.56           | 0.48   |
|                      |     |                      |        |                |        |                |        |
| Cluster 2            |     |                      |        |                |        |                |        |
|                      |     | Beginning Semester 1 |        | End Semester 1 |        | End Semester 2 |        |
|                      | N   | Mean                 | St Dev | Mean           | St Dev | Mean           | St Dev |
| Female               | 67  | 4.69                 | 0.66   | 4.57           | 0.72   | 4.37           | 0.73   |
| Male                 | 44  | 4.57                 | 0.83   | 4.77           | 0.76   | 4.51           | 1.08   |
| Missing              | 7   | 4.68                 | 0.88   | 4.21           | 0.76   | 4.04           | 1.86   |
|                      |     |                      |        |                |        |                |        |
| not PEERS            | 85  | 4.58                 | 0.77   | 4.65           | 0.75   | 4.45           | 0.93   |
| PEERS                | 28  | 4.87                 | 0.60   | 4.69           | 0.69   | 4.44           | 0.79   |
| Missing              | 5   | 4.50                 | 0.85   | 3.95           | 0.82   | 3.40           | 1.85   |
|                      |     |                      |        |                |        |                |        |
| not first-generation | 75  | 4.65                 | 0.78   | 4.56           | 0.79   | 4.36           | 1.09   |

|                  |    |      |      |      |      |      |      |
|------------------|----|------|------|------|------|------|------|
| first-generation | 31 | 4.69 | 0.58 | 4.73 | 0.65 | 4.54 | 0.53 |
| Missing          | 12 | 4.50 | 0.90 | 4.81 | 0.73 | 4.31 | 1.01 |

Table S6: Cronbach's alpha values for each measure of student affect at each time point

| <b>Measure</b>              | <b>Beginning of first semester</b> | <b>End of first semester</b> | <b>End of second semester</b> |
|-----------------------------|------------------------------------|------------------------------|-------------------------------|
| Self-efficacy               | 0.90                               | 0.96                         | 0.93                          |
| Science identity            | 0.86                               | 0.91                         | 0.90                          |
| Scientific community values | 0.86                               | 0.89                         | 0.86                          |

Table S7. Confirmatory factor analysis measures for survey at each time point

| <b>Fit measure</b> | <b>Beginning of first semester</b> | <b>End of first semester</b> | <b>End of second semester</b> |
|--------------------|------------------------------------|------------------------------|-------------------------------|
| RMSEA              | 0.068                              | 0.083                        | 0.073                         |
| SRMR               | 0.052                              | 0.047                        | 0.039                         |
| CFI                | 0.935                              | 0.942                        | 0.957                         |

Table S8: Model fit statistics for growth mixture model (GMM) for self-efficacy. Each GMM was fitted with one to nine classes. Only models for which a solution was possible are reported. The best model based on SABIC is highlighted in bold.

| Model          | Random effects   | Random effects variance | Residual variance     | Number of classes | Log-likelihood   | AIC             | BIC               | SABIC              | ICL             | EIC             |
|----------------|------------------|-------------------------|-----------------------|-------------------|------------------|-----------------|-------------------|--------------------|-----------------|-----------------|
| Model 1        | null             |                         |                       |                   | -1137.677        | 2279.355        | 2287.058405       | 2292.418164        | 2289.256        |                 |
| Model 2        | intercept        | fixed                   | fixed                 | 1                 | -1057.426        | 2122.853        | 2138.26081        | 2148.980327        | 2142.656        |                 |
|                |                  |                         |                       | 2                 | -1057.42         | 2128.84         | 2155.805417       | 2174.564573        | 2621.612        | 0.001476        |
| Model 3        | intercept, slope | fixed                   | fixed                 | 1                 | -1057.487        | 2126.973        | 2150.087215       | 2166.166491        | 2156.678        |                 |
|                |                  |                         |                       | 2                 | -1057.487        | 2132.973        | 2167.643822       | 2191.762736        | 2603.533        | 0.005777        |
| Model 4        | intercept        | class-specific          | fixed                 | 1                 | -1057.426        | 2122.853        | 2138.26081        | 2148.980327        | 2142.656        |                 |
|                |                  |                         |                       | 2                 | -1037.681        | 2091.363        | 2122.17962        | 2143.618654        | 2132.721        | 0.988683        |
|                |                  |                         |                       | 3                 | -1029.796        | 2083.593        | 2129.81843        | 2161.976982        | 2145.165        | 0.992854        |
|                |                  |                         |                       | 4                 | -1029.773        | 2091.546        | 2153.18124        | 2196.059309        | 2551.936        | 0.518026        |
|                |                  |                         |                       | 5                 | -1029.781        | 2099.562        | 2176.60605        | 2230.203636        | 2800.805        | 0.340602        |
| Model 5        | intercept, slope | class-specific          | fixed                 | 1                 | -1057.487        | 2126.973        | 2150.087215       | 2166.166491        | 2156.678        |                 |
|                |                  |                         |                       | 2                 | -1025.71         | 2075.42         | 2121.64643        | 2153.804982        | 2150.351        | 0.888272        |
| <b>Model 6</b> | <b>intercept</b> | <b>fixed</b>            | <b>class-specific</b> | 1                 | -1057.4264       | 2122.853        | 2138.26161        | 2148.981127        | 2142.656        |                 |
|                |                  |                         |                       | <b>2</b>          | <b>-955.3488</b> | <b>1926.698</b> | <b>1957.51522</b> | <b>1978.954254</b> | <b>1997.172</b> | <b>0.812217</b> |
| Model 7        | intercept,       | fixed                   | class-                | 1                 | -1057.4867       | 2126.973        | 2150.086615       | 2166.165891        | 2156.678        |                 |

|         |                     |                |                |   |            |          |             |             |          |          |
|---------|---------------------|----------------|----------------|---|------------|----------|-------------|-------------|----------|----------|
|         | slope               |                | specific       |   |            |          |             |             |          |          |
|         |                     |                |                | 2 | -955.6992  | 1931.398 | 1969.920425 | 1996.719218 | 2011.201 | 0.815105 |
| Model 8 | intercept           | class-specific | class-specific | 1 | -1057.4264 | 2122.853 | 2138.26161  | 2148.981127 | 2142.656 |          |
|         |                     |                |                | 2 | -953.9723  | 1925.945 | 1960.614422 | 1984.733336 | 2002.546 | 0.809836 |
| Model 9 | intercept,<br>slope | class-specific | class-specific | 1 | -1057.4867 | 2126.973 | 2150.086615 | 2166.165891 | 2156.678 |          |
|         |                     |                |                | 2 | -954.1604  | 1934.321 | 1984.399432 | 2019.237863 | 2030.637 | 0.811238 |

Table S8: Model fit statistics for growth mixture model (GMM) for science identity. Each GMM was fitted with one to nine classes. Only models for which a solution was possible are reported. The best model based on SABIC is highlighted in bold.

| Model          | Random effects      | Random effects variance | Residual variance | Number of classes | Log-likelihood   | AIC             | BIC                | SABIC             | ICL             | EIC             |
|----------------|---------------------|-------------------------|-------------------|-------------------|------------------|-----------------|--------------------|-------------------|-----------------|-----------------|
| Model 1        | null                |                         |                   |                   | -1225.183        | 2454.367        | 2462.081866        | 2469.650246       | 2464.28         |                 |
| <b>Model 2</b> | <b>intercept</b>    | <b>fixed</b>            | <b>fixed</b>      | 1                 | -1071.274        | 2150.548        | 2165.979733        | 2181.116491       | 2170.374        |                 |
|                |                     |                         |                   | <b>2</b>          | <b>-1053.034</b> | <b>2120.068</b> | <b>2147.073532</b> | <b>2173.56286</b> | <b>2190.085</b> | <b>0.835038</b> |
|                |                     |                         |                   | 3                 | -1052.966        | 2125.931        | 2164.511332        | 2202.353228       | 2515.515        | 0.356328        |
| Model 3        | intercept,<br>slope | fixed                   | fixed             | 1                 | -1065.472        | 2142.944        | 2166.091599        | 2188.796737       | 2172.683        |                 |
|                |                     |                         |                   | 2                 | -1065.472        | 2148.944        | 2183.665398        | 2217.723105       | 2653.379        | 0.001439        |
| Model 4        | intercept           | class-specific          | fixed             | 1                 | -1071.274        | 2150.548        | 2165.979733        | 2181.116491       | 2170.374        |                 |
|                |                     |                         |                   | 2                 | -1051.934        | 2119.868        | 2150.731465        | 2181.004982       | 2211.689        | 0.74619         |
|                |                     |                         |                   | 3                 | -1043.816        | 2111.632        | 2157.927198        | 2203.337473       | 2221.032        | 0.848618        |
|                |                     |                         |                   | 4                 | -1038.698        | 2109.396        | 2171.12293         | 2231.669965       | 2228.154        | 0.905767        |
| Model 5        | intercept,<br>slope | class-specific          | fixed             | 1                 | -1065.472        | 2142.944        | 2166.091599        | 2188.796737       | 2172.683        |                 |
|                |                     |                         |                   | 2                 | -1045.716        | 2115.433        | 2161.727198        | 2207.137473       | 2268.316        | 0.559699        |
| Model 6        | intercept           | fixed                   | class-specific    | 1                 | -1071.274        | 2150.548        | 2165.979733        | 2181.116491       | 2170.374        |                 |
|                |                     |                         |                   | 2                 | -1028.1259       | 2072.252        | 2103.115265        | 2133.388782       | 2273.392        | 0.391305        |
| Model 7        | intercept,          | fixed                   | class-            | 1                 | -1065.4718       | 2142.944        | 2166.091199        | 2188.796337       | 2172.683        |                 |



|         |                     |                |                |   |            |          |             |             |          |          |
|---------|---------------------|----------------|----------------|---|------------|----------|-------------|-------------|----------|----------|
|         | slope               |                | specific       |   |            |          |             |             |          |          |
|         |                     |                |                | 2 | -1027.3398 | 2074.68  | 2113.258932 | 2151.100828 | 2288.715 | 0.387465 |
| Model 8 | intercept           | class-specific | class-specific | 1 | -1071.274  | 2150.548 | 2165.979733 | 2181.116491 | 2170.374 |          |
|         |                     |                |                | 2 | -1028.0928 | 2074.186 | 2108.906998 | 2142.964705 | 2279.634 | 0.391742 |
| Model 9 | intercept,<br>slope | class-specific | class-specific | 1 | -1065.4718 | 2142.944 | 2166.091199 | 2188.796337 | 2172.683 |          |

Table S10: Model fit statistics for growth mixture model (GMM) for scientific community values. Each GMM was fitted with one to nine classes. Only models for which a solution was possible are reported. The best model based on SABIC is highlighted in bold.

| Model   | Random effects   | Random effects variance | Residual variance | Number of classes | Log-likelihood | AIC      | BIC         | SABIC       | ICL      | EIC      |
|---------|------------------|-------------------------|-------------------|-------------------|----------------|----------|-------------|-------------|----------|----------|
| Model 1 | null             |                         |                   |                   | -1203.222      | 2410.444 | 2418.148405 | 2423.508164 | 2420.346 |          |
| Model 2 | intercept        | fixed                   | fixed             | 1                 | -1114.611      | 2237.223 | 2252.63081  | 2263.350327 | 2257.041 |          |
|         |                  |                         |                   | 2                 | -1065.326      | 2144.651 | 2171.617417 | 2190.376573 | 2191.424 | 0.945222 |
|         |                  |                         |                   | 3                 | -1065.315      | 2150.631 | 2189.152025 | 2215.950818 | 2582.392 | 0.375731 |
|         |                  |                         |                   | 4                 | -1030.106      | 2086.212 | 2136.290632 | 2171.129063 | 2238.231 | 0.806296 |
| Model 3 | intercept, slope | fixed                   | fixed             | 1                 | -1089.69       | 2191.381 | 2214.493215 | 2230.572491 | 2221.086 |          |
|         |                  |                         |                   | 2                 | -1089.69       | 2197.379 | 2232.049822 | 2256.168736 | 2674.313 | 0.00525  |
|         |                  |                         |                   | 3                 | no solution    |          |             |             |          |          |
|         |                  |                         |                   | 4                 | -1089.684      | 2209.367 | 2267.151037 | 2307.349227 | 3176.337 | 0.002    |
| Model 4 | intercept        | class-specific          | fixed             | 1                 | -1108.317      | 2224.634 | 2240.04281  | 2250.762327 | 2244.437 |          |
|         |                  |                         |                   | 2                 | -1058.519      | 2133.037 | 2163.85562  | 2185.294654 | 2185.177 | 0.941824 |
|         |                  |                         |                   | 3                 | -1033.855      | 2091.711 | 2137.93643  | 2170.094982 | 2270.385 | 0.68437  |
|         |                  |                         |                   | 4                 | -1017.281      | 2066.562 | 2128.19724  | 2171.075309 | 2291.312 | 0.692057 |
|         |                  |                         |                   | 5                 | -1009.073      | 2058.146 | 2135.19005  | 2188.787636 | 2313.332 | 0.708929 |
|         |                  |                         |                   | 6                 | -1005.799      | 2059.598 | 2152.05086  | 2216.367963 | 2338.11  | 0.731869 |
|         |                  |                         |                   | 7                 | -1003.703      | 2063.406 | 2171.267669 | 2246.304291 | 2357.977 | 0.759165 |

|                |                     |                    |                            |          |                  |                 |                   |                    |                 |                 |
|----------------|---------------------|--------------------|----------------------------|----------|------------------|-----------------|-------------------|--------------------|-----------------|-----------------|
| Model 5        | intercept,<br>slope | class-<br>specific | fixed                      | 1        | -1089.69         | 2191.381        | 2214.493215       | 2230.572491        | 2221.086        |                 |
|                |                     |                    |                            | 2        | -1026.732        | 2077.465        | 2123.69043        | 2155.848982        | 2223.919        | 0.651584        |
| <b>Model 6</b> | <b>intercept</b>    | <b>fixed</b>       | <b>class-<br/>specific</b> | 1        | -1108.3171       | 2224.634        | 2240.04301        | 2250.762527        | 2244.437        |                 |
|                |                     |                    |                            | <b>2</b> | <b>-994.0373</b> | <b>2004.075</b> | <b>2034.89222</b> | <b>2056.331254</b> | <b>2120.156</b> | <b>0.655708</b> |
| Model 7        | intercept,<br>slope | fixed              | class-<br>specific         | 1        | -1089.6904       | 2191.381        | 2214.494015       | 2230.573291        | 2221.086        |                 |
|                |                     |                    |                            | 2        | -992.8258        | 2005.652        | 2044.173625       | 2070.972418        | 2133.084        | 0.650814        |
| Model 8        | intercept           | class-<br>specific | class-<br>specific         | 1        | -1114.6113       | 2237.223        | 2252.63141        | 2263.350927        | 2257.041        |                 |
|                |                     |                    |                            | 2        | -999.9397        | 2017.879        | 2052.549222       | 2076.668136        | 2133.677        | 0.677282        |
| Model 9        | intercept,<br>slope | class-<br>specific | class-<br>specific         | 1        | -1096.5473       | 2205.095        | 2228.207815       | 2244.287091        | 2234.822        |                 |
|                |                     |                    |                            | 2        | -990.4382        | 2006.876        | 2056.955032       | 2091.793463        | 2144.484        | 0.668715        |

Table S11: Effects of demographic factors on measures of student affect based on mixed effects models. Parameter estimates were calculated where PEERs = yes, female/male = male, and first-generation = yes. Significant parameters are indicated in bold.

| Self-efficacy           |              |             |                |                |                  |
|-------------------------|--------------|-------------|----------------|----------------|------------------|
| Cluster 1 (N=22)        |              |             |                |                |                  |
|                         | Estimate     | SE          | df             | X <sup>2</sup> | P                |
| <b>Intercept</b>        | <b>2.60</b>  | <b>0.58</b> | <b>20.47</b>   | <b>1</b>       | <b>&lt;0.001</b> |
| time                    | 0.41         | 0.27        | 2.37           | 1              | 0.12             |
| PEERs                   | -1.53        | 1.04        | 2.17           | 1              | 0.14             |
| female/male             | 1.09         | 1.02        | 1.14           | 1              | 0.28             |
| first-generation        | 1.54         | 1.10        | 1.95           | 1              | 0.16             |
| time x PEERs            | 0.53         | 0.48        | 1.19           | 1              | 0.28             |
| time x female/male      | -0.62        | 0.47        | 1.73           | 1              | 0.19             |
| time x first-generation | -0.66        | 0.51        | 1.69           | 1              | 0.19             |
| Cluster 2 (N=297)       |              |             |                |                |                  |
|                         | Estimate     | SE          | df             | X <sup>2</sup> | P                |
| <b>Intercept</b>        | <b>3.68</b>  | <b>0.06</b> | <b>3537.56</b> | <b>1</b>       | <b>&lt;0.001</b> |
| <b>time</b>             | <b>0.25</b>  | <b>0.03</b> | <b>96.25</b>   | <b>1</b>       | <b>&lt;0.001</b> |
| <b>PEERs</b>            | <b>-0.23</b> | <b>0.11</b> | <b>4.77</b>    | <b>1</b>       | <b>0.03</b>      |
| <b>female/male</b>      | <b>0.19</b>  | <b>0.09</b> | <b>4.15</b>    | <b>1</b>       | <b>0.04</b>      |
| first-generation        | -0.003       | 0.11        | 0.001          | 1              | 0.98             |
| time x PEERs            | 0.03         | 0.04        | 0.35           | 1              | 0.55             |
| time x female/male      | -0.03        | 0.04        | 0.55           | 1              | 0.46             |
| time x first-generation | -0.002       | 0.05        | 0.002          | 1              | 0.96             |
| Science identity        |              |             |                |                |                  |
| Cluster 1 (N=19)        |              |             |                |                |                  |
|                         | Estimate     | SE          | df             | X <sup>2</sup> | P                |
| <b>Intercept</b>        | <b>3.25</b>  | <b>0.32</b> | <b>101.69</b>  | <b>1</b>       | <b>&lt;0.001</b> |
| <b>time</b>             | <b>-0.39</b> | <b>0.13</b> | <b>8.43</b>    | <b>1</b>       | <b>0.004</b>     |
| PEERs                   | -0.42        | 0.82        | 0.27           | 1              | 0.60             |
| female/male             | 0.60         | 0.52        | 1.30           | 1              | 0.25             |
| first-generation        | 0.25         | 0.77        | 0.11           | 1              | 0.74             |
| time x PEERs            | 0.07         | 0.34        | 0.04           | 1              | 0.83             |
| time x female/male      | -0.13        | 0.22        | 0.36           | 1              | 0.55             |
| time x first-generation | -0.05        | 0.32        | 0.02           | 1              | 0.88             |
| Cluster 2 (N=301)       |              |             |                |                |                  |
|                         | Estimate     | SE          | df             | X <sup>2</sup> | P                |
| <b>Intercept</b>        | 3.57         | 0.07        | 2398.11        | 1              | <b>&lt;0.001</b> |
| <b>time</b>             | 0.18         | 0.03        | 36.70          | 1              | <b>&lt;0.001</b> |
| PEERs                   | -0.04        | 0.12        | 0.10           | 1              | 0.75             |

|                             |             |             |             |                |                  |
|-----------------------------|-------------|-------------|-------------|----------------|------------------|
| <b>female/male</b>          | <b>0.22</b> | <b>0.11</b> | <b>4.13</b> | <b>1</b>       | <b>0.04</b>      |
| first-generation            | 0.01        | 0.13        | 0.005       | 1              | 0.95             |
| time x PEERs                | -0.07       | 0.05        | 1.96        | 1              | 0.16             |
| time x female/male          | -0.03       | 0.04        | 0.61        | 1              | 0.43             |
| time x first-generation     | 0.001       | 0.05        | 0.0002      | 1              | 0.99             |
| Scientific community values |             |             |             |                |                  |
| Cluster 1                   |             |             |             |                |                  |
|                             | Estimate    | SE          | df          | X <sup>2</sup> | P                |
| <b>Intercept</b>            | <b>5.56</b> | <b>0.06</b> | <b>1</b>    | <b>9020.31</b> | <b>&lt;0.001</b> |
| time                        | 0.02        | 0.03        | 1           | 0.76           | 0.38             |
| PEERs                       | 0.09        | 0.10        | 1           | 0.84           | 0.36             |
| female/male                 | 0.03        | 0.09        | 1           | 0.08           | 0.78             |
| first-generation            | -0.08       | 0.11        | 1           | 0.55           | 0.46             |
| time x PEERs                | -0.07       | 0.04        | 1           | 2.42           | 0.12             |
| time x female/male          | -0.002      | 0.04        | 1           | 0.003          | 0.96             |
| time x first-generation     | 0.02        | 0.05        | 1           | 0.23           | 0.63             |
| Cluster 2                   |             |             |             |                |                  |
|                             | Estimate    | SE          | df          | X <sup>2</sup> | P                |
| <b>Intercept</b>            | <b>4.80</b> | <b>0.17</b> | <b>1</b>    | <b>836.43</b>  | <b>&lt;0.001</b> |
| time                        | -0.14       | 0.08        | 1           | 3.09           | 0.08             |
| PEERs                       | 0.32        | 0.28        | 1           | 1.31           | 0.25             |
| female/male                 | -0.18       | 0.23        | 1           | 0.58           | 0.45             |
| first-generation            | -0.15       | 0.28        | 1           | 0.27           | 0.60             |
| time x PEERs                | -0.12       | 0.13        | 1           | 0.91           | 0.34             |
| time x female/male          | 0.09        | 0.11        | 1           | 0.74           | 0.39             |
| time x first-generation     | 0.13        | 0.13        | 1           | 1.04           | 0.31             |

Table S12: Correlations between measures of student affect at the beginning, middle, and end of a two-semester introductory biology sequence

|                    | self_efficacy_1 | self_efficacy_2 | self_efficacy_3 | science_identity_1 | science_identity_2 | science_identity_3 | community_1 | community_2 | community_3 |
|--------------------|-----------------|-----------------|-----------------|--------------------|--------------------|--------------------|-------------|-------------|-------------|
| self_efficacy_1    | 1               | 0.28            | 0.32            | 0.50               | 0.33               | 0.29               | 0.25        | 0.25        | 0.22        |
| self_efficacy_2    | 0.28            | 1               | 0.40            | 0.34               | 0.52               | 0.40               | 0.28        | 0.48        | 0.38        |
| self_efficacy_3    | 0.32            | 0.40            | 1               | 0.25               | 0.35               | 0.55               | 0.27        | 0.38        | 0.58        |
| science_identity_1 | 0.50            | 0.34            | 0.25            | 1                  | 0.59               | 0.49               | 0.43        | 0.40        | 0.34        |
| science_identity_2 | 0.33            | 0.52            | 0.35            | 0.59               | 1                  | 0.61               | 0.37        | 0.60        | 0.42        |
| science_identity_3 | 0.29            | 0.40            | 0.55            | 0.49               | 0.61               | 1                  | 0.32        | 0.47        | 0.65        |
| community_1        | 0.25            | 0.28            | 0.27            | 0.43               | 0.37               | 0.32               | 1           | 0.47        | 0.35        |
| community_2        | 0.25            | 0.48            | 0.38            | 0.40               | 0.60               | 0.47               | 0.47        | 1           | 0.54        |
| community_3        | 0.22            | 0.38            | 0.58            | 0.34               | 0.42               | 0.65               | 0.35        | 0.54        | 1           |
